# Supplementary material for: Life-Long Experience with Male Mating Tactics Shapes Spatial Cognition and Coercion Evasion in Female Swordtails
Source: MDPI journal article supplement (doi:10.3390/fishes8110562), 2023-11-20
Supplement: s1 [file s1]

Supplementary material for *Life-long social experience shapes spatial cognition and coercion evasion in female swordtails* by Philip S. Queller, Elena R.M. Adams, Molly E. Cummings

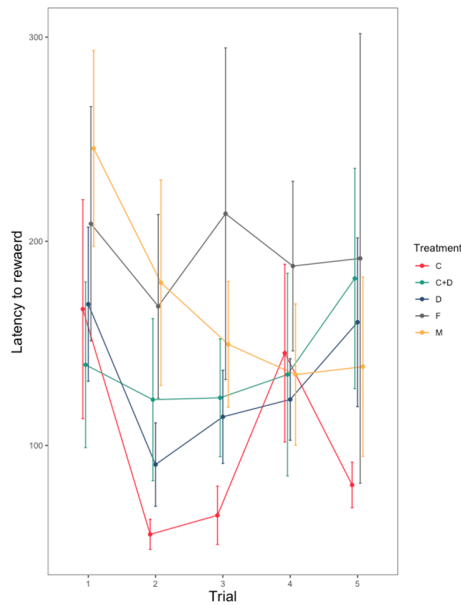

**Supplementary Figure S1:** Results from the route-learning maze including all 5 trials. There was no effect of trial among C females (estimate = -9.25,  $t = -0.95$ ,  $df = 52.7$ ,  $p = 0.34$ ), D females (estimate = -3.69,  $t = -0.40$ ,  $df = 49.07$ ,  $p = 0.70$ ), C+D females (estimate = 10.43,  $t = 0.81$ ,  $df = 34.22$ ,  $p = 0.42$ ), or F females (estimate = -2.84,  $t = -0.17$ ,  $df = 24.39$ ,  $p = 0.87$ ) and there was a trend for M females to decrease their latency to reward over 5 trials (estimate = -23.17,  $t = -2.01$ ,  $df = 36.42$ ,  $p = 0.052$ )

| Day | Assay            |
|-----|------------------|
| 1   | Mate choice      |
| 2   | Route learning   |
| 3   | Aggression       |
| 4   | Detour           |
| 5   | Sociability      |
| 6   | Shuttlebox       |
| 7   | Coercion evasion |
| 8   | Scototaxis       |
| 9   | Social cognition |

**Supplementary Table S1:** Schedule of assays including assays published elsewhere (aggression, sociability, scototaxis in Queller et al 2022) and assays to be published in subsequent articles. Here, we report data from route learning (day 2) and coercion evasion (day 7).
